# Supplementary material
Source: PubMed Central journal article supplement (PMC3893718)
Supplement: NIHMS491409-supplement-1.pdf [file NIHMS491409-supplement-1.pdf]

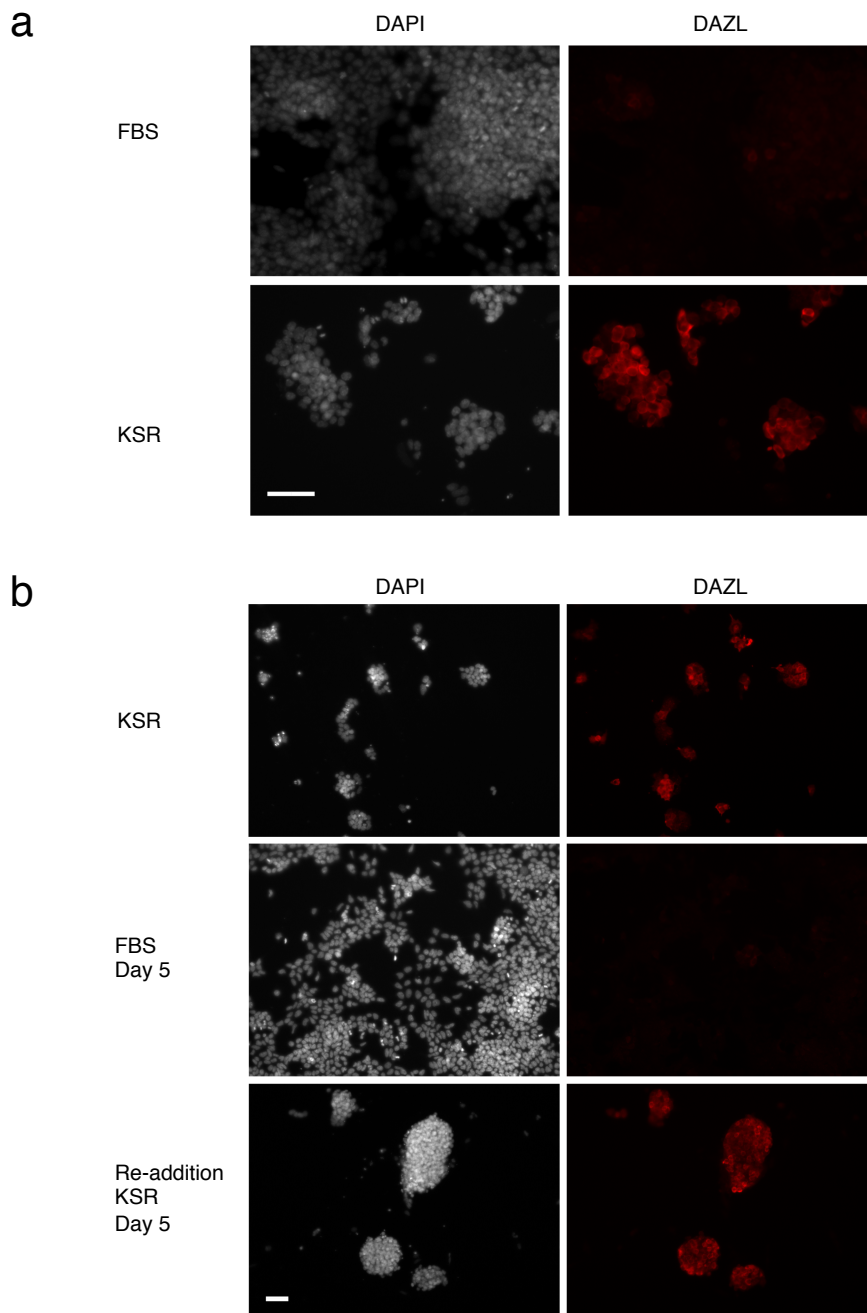

**Supplementary Figure 1: Knockout Serum Replacement (KSR) induces DAZL expression in ESCs. a, b,** Immunofluorescence for DAZL (red). **a,** DAZL is expressed in ESCs maintained in KSR but not FBS medium. **b,** DAZL expression is reversible. ESCs maintained in KSR were transferred to FBS medium for 5 days and then returned to KSR for an additional 5 days. DAZL is decreased with FBS medium, but is re-expressed when cells are returned to KSR medium. Scale bar is 80  $\mu\text{m}$  in panel a, and 100  $\mu\text{m}$  in panel b.

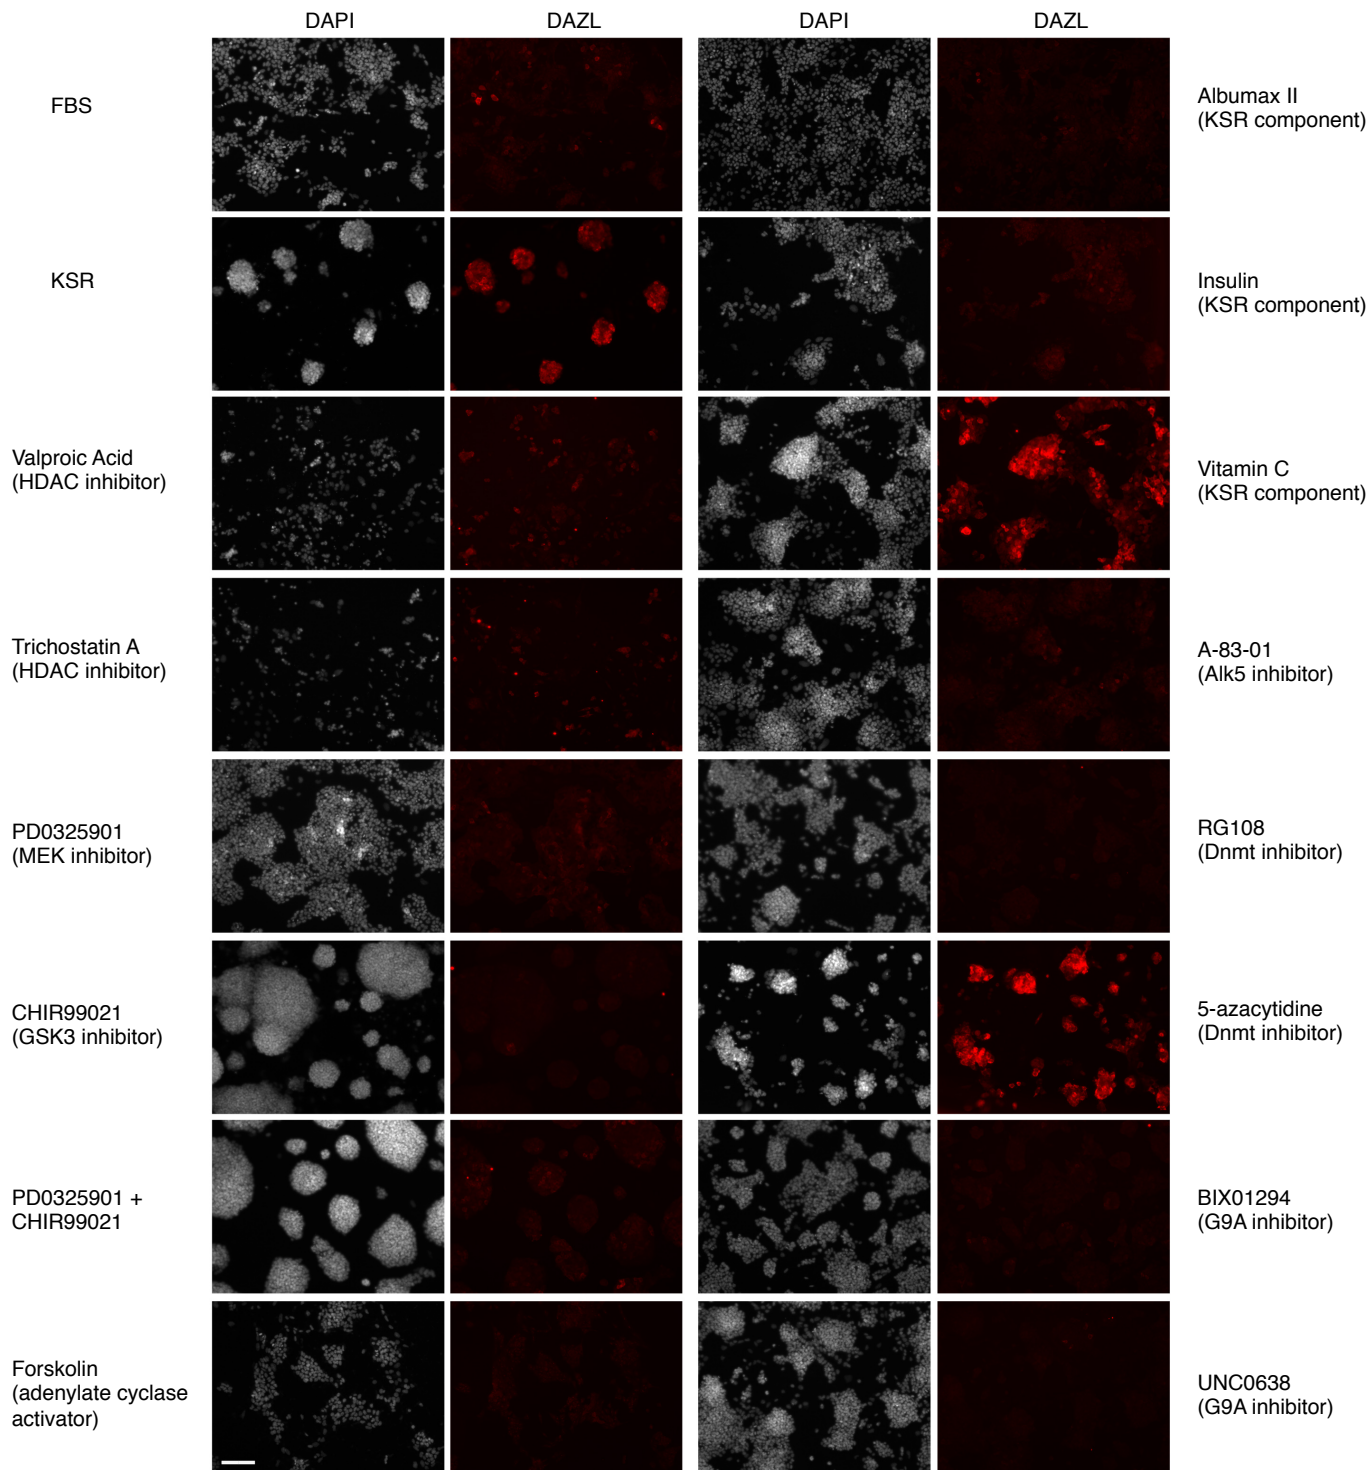

**Supplementary Figure 2: Small molecule screen for factors that induce DAZL expression in ESCs.** Immunofluorescence for DAZL (red). ESCs maintained in FBS medium were treated with factors for 3 - 6 days. DAZL expression is induced upon VitC or 5-azacytidine treatment. Scale bar is 200  $\mu$ m.

## Vitamin C quantification

|                                                         | Concentration of Vitamin C added |                   |                    |                  |
|---------------------------------------------------------|----------------------------------|-------------------|--------------------|------------------|
|                                                         | Medium alone                     | 2.8 $\mu\text{M}$ | 13.8 $\mu\text{M}$ | 69 $\mu\text{M}$ |
| Calculated concentration of Vitamin C ( $\mu\text{M}$ ) | -0.03*                           | 1.47*             | 10.21              | 46.96            |

\*Values are below the detection limit of the assay, which is 2  $\mu\text{M}$

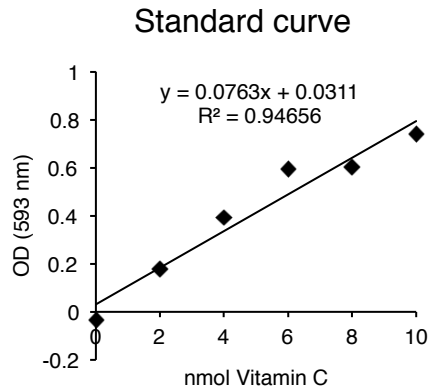

**Supplementary Figure 3: 2i medium does not contain any detectable Vitamin C.** VitC was quantified in the 2i culture medium used in this study. We confirm that there is no detectable VitC in the medium. Known concentrations of VitC were added to the medium as controls. The standard curve used to calculate VitC concentration is shown.

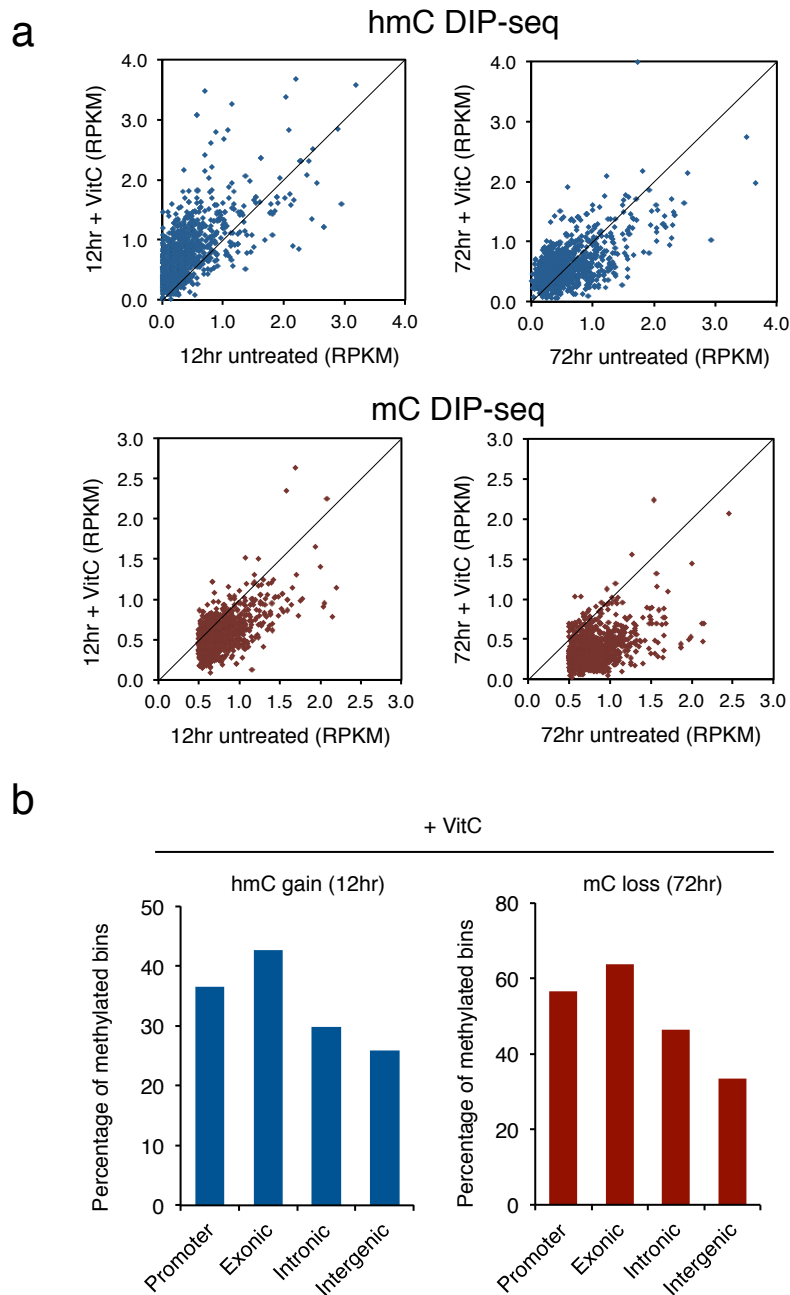

**Supplementary Figure 4: Vitamin C induces a genome-wide increase in hmC at 12 hrs and decrease in mC at 72 hrs.** **a**, mC DIP-seq RPKM values were used to identify methylated promoters in untreated ESCs (TSS  $\pm$  500 bp, RPKM  $>$ 0.5 in both 12 hr and 72 hr untreated). Methylated promoters were plotted comparing untreated versus VitC at 12 and 72 hrs for hmC (blue) and mC (red) levels. **b**, DIP-seq genome coverage was binned using sliding 1,000 bp windows with 500 bp offset between windows. Percentage of methylated bins (mC DIP-seq RPKM  $>$ 0.5) that gain hmC by at least 2-fold at 12 hrs (blue) or lose mC by at least 2-fold at 72 hrs (red) within each genomic feature after VitC treatment.

a

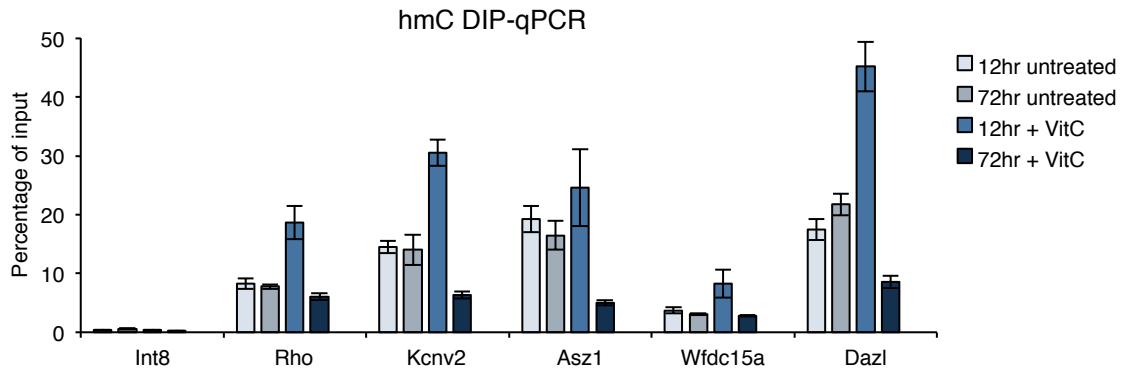

b

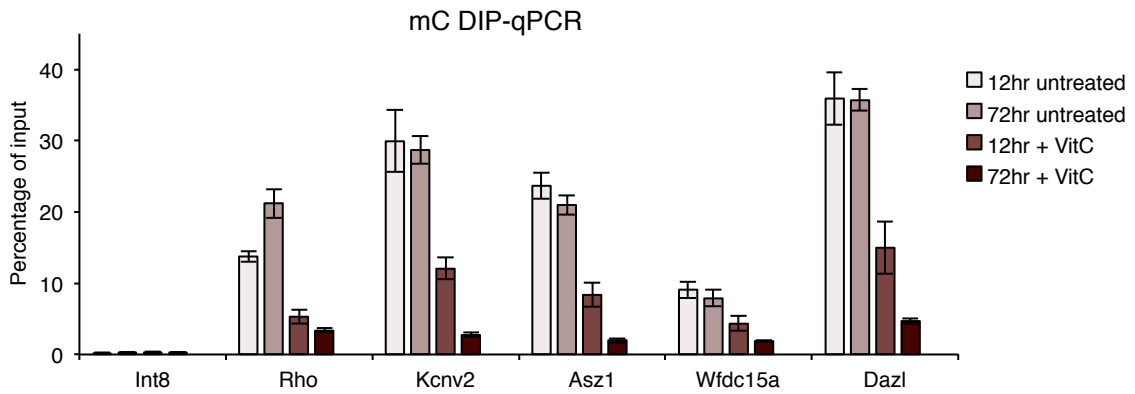

**Supplementary Figure 5: Vitamin C induces a transient increase in hmC and a progressive decrease in mC at gene promoters. a, b, DIP-qPCR at 12 and 72 hrs VitC treatment for hmC (a) and mC (b), respectively. Data are expressed as percent input  $\pm$  s.d., n = 3 technical replicates.**

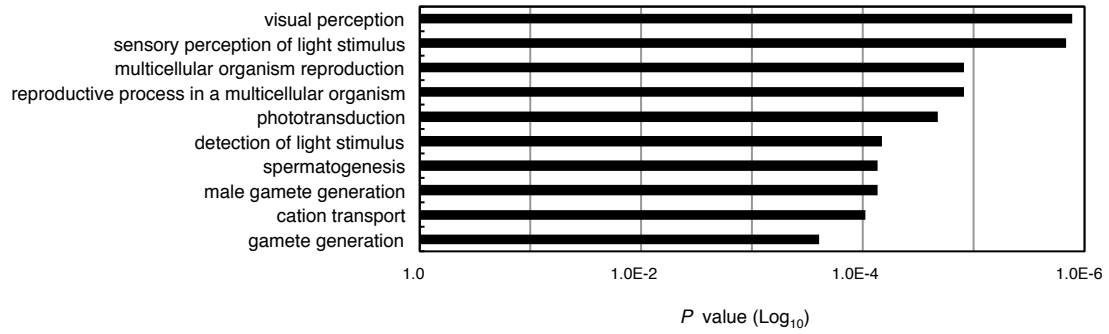

**Supplementary Figure 6: Gene ontology analysis of promoters that gain hmC at 12 hrs or lose mC at 72 hrs in the presence of Vitamin C.** Promoters that gain hmC at 12 hrs or lose mC at 72 hrs (n = 803) with VitC treatment show an enrichment for germline and vision-associated gene ontology terms.

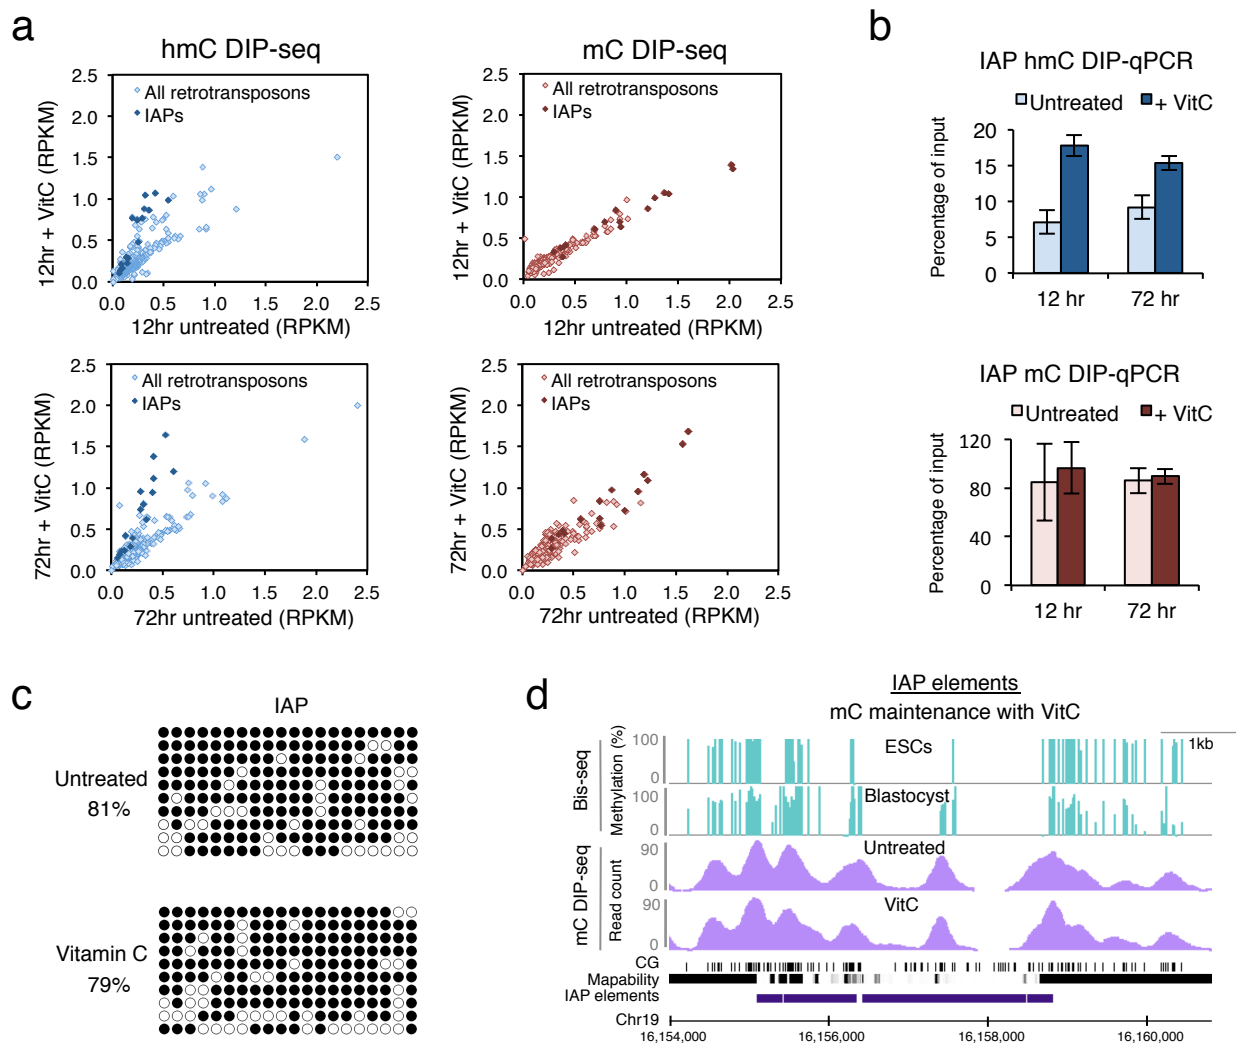

**Supplementary Figure 7: IAP retrotransposons are resistant to Vitamin C-induced demethylation.**

**a**, hmC and mC DIP-seq RPKM values at retrotransposons were plotted for untreated versus VitC-treated. Only the IAP subfamily of retrotransposons gains hmC at 12 hrs and maintains hmC at 72 hrs in response to VitC (left). The retention of hmC at IAPs at 72 hrs may account for the global increase in hmC observed at 72 hrs by immunofluorescence and dot blot (Fig. 1a, b). All retrotransposons maintain mC following VitC treatment (right). **b**, hmC (top) and mC (bottom) DIP-qPCR was performed for IAP retrotransposons at 12 and 72 hrs  $\pm$  VitC treatment to validate the DIP-seq data. IAPs are resistant to VitC-induced demethylation despite an observed increase in hmC. It is likely that the observed increase in hmC occurs in only a small fraction of methylated CpGs within IAP elements, resulting in no detectable loss of overall methylation by DIP. Data are expressed as percent input  $\pm$  s.d.,  $n = 3$  technical replicates. **c**, Bisulfite sequencing of IAP elements shows no significant difference in 72 hr untreated and VitC-treated samples. Open circles = unmethylated, closed circles = methylated. **d**, Genomic region containing IAP elements that are similarly methylated in ESCs and the blastocyst and are resistant to VitC-induced demethylation. Bis-seq data are from ref. 13. Lack of methylation signal within IAP elements is due to poor mapability.

### hmC dot blot

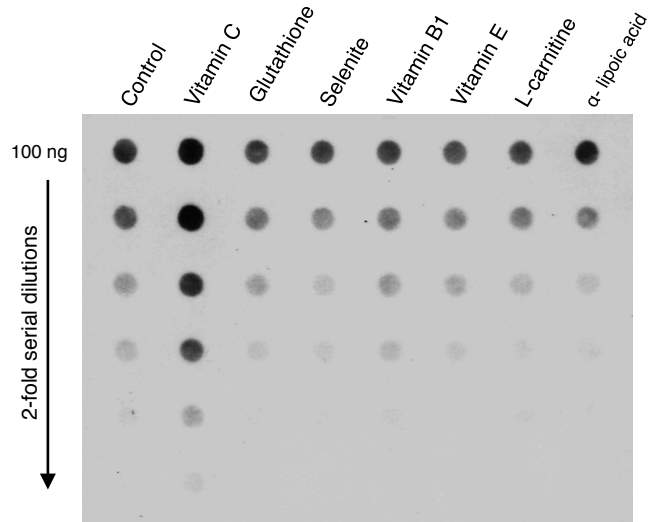

**Supplementary Figure 8: Other antioxidants do not increase hmC levels in ESCs.** ESCs treated for 24 hrs with VitC or other antioxidants, followed by global hmC analysis by dot blot.



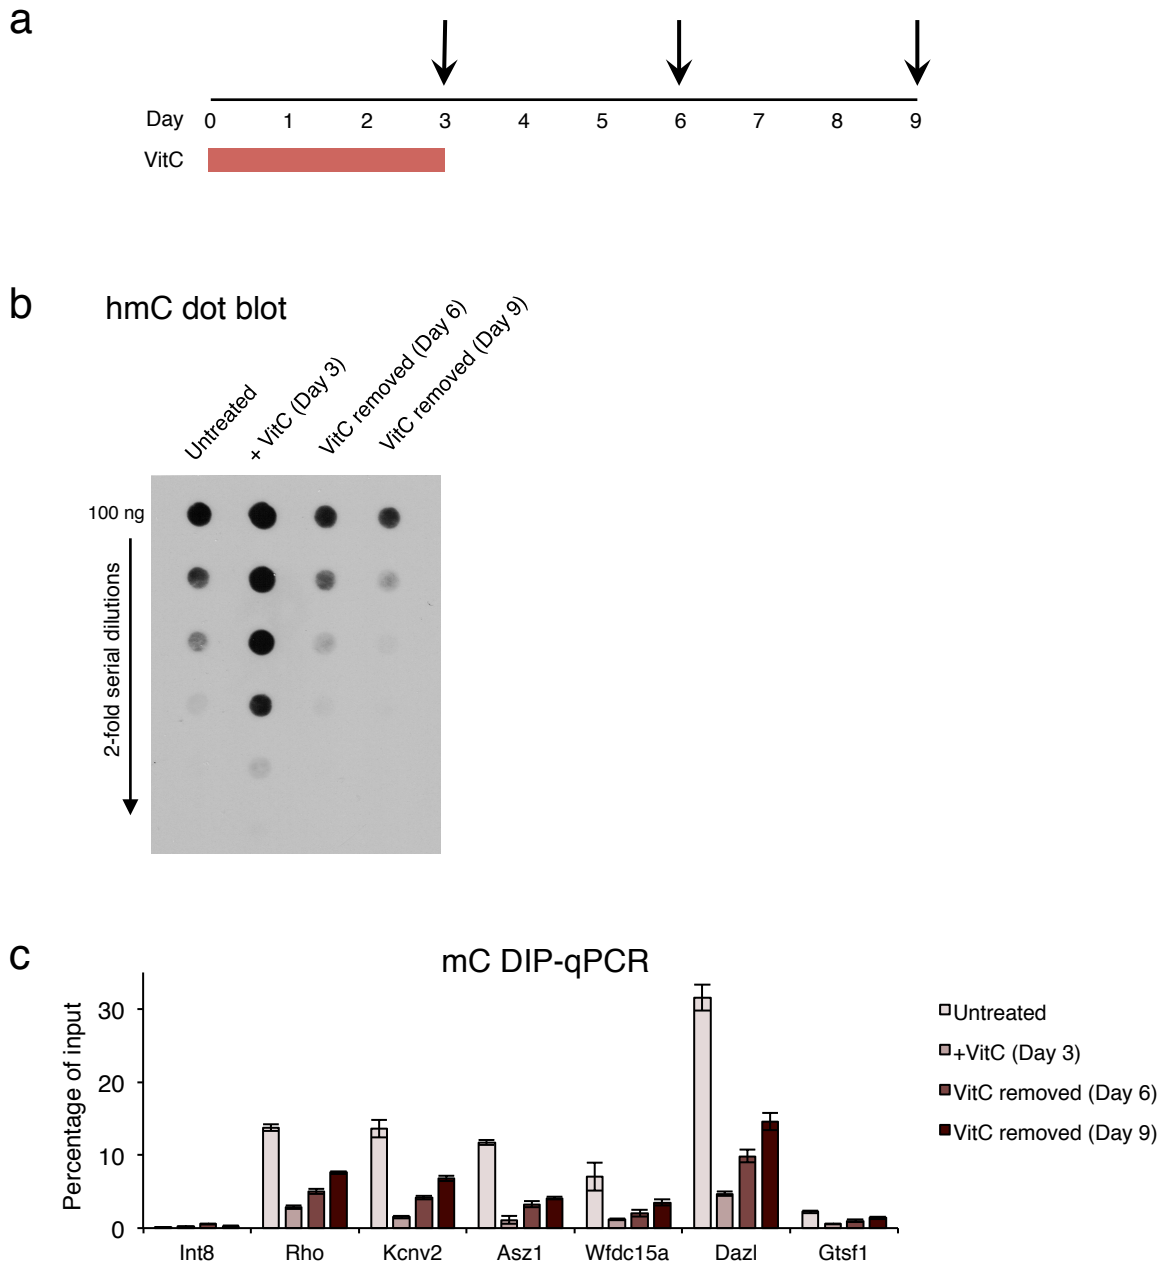

**Supplementary Figure 9: The effects of Vitamin C are reversible.** **a**, Timeline of VitC treatment. VitC was added for 3 days and then removed for 6 days. Arrows indicate time points of analysis. **b**, Dot blot for hmC. hmC is increased at day 3 of VitC treatment and levels return to baseline following VitC removal. **c**, mC DIP-qPCR. mC is reduced on day 3 of VitC treatment and levels increase progressively following VitC removal. Data are expressed as percent input  $\pm$  s.d., n = 3 technical replicates.

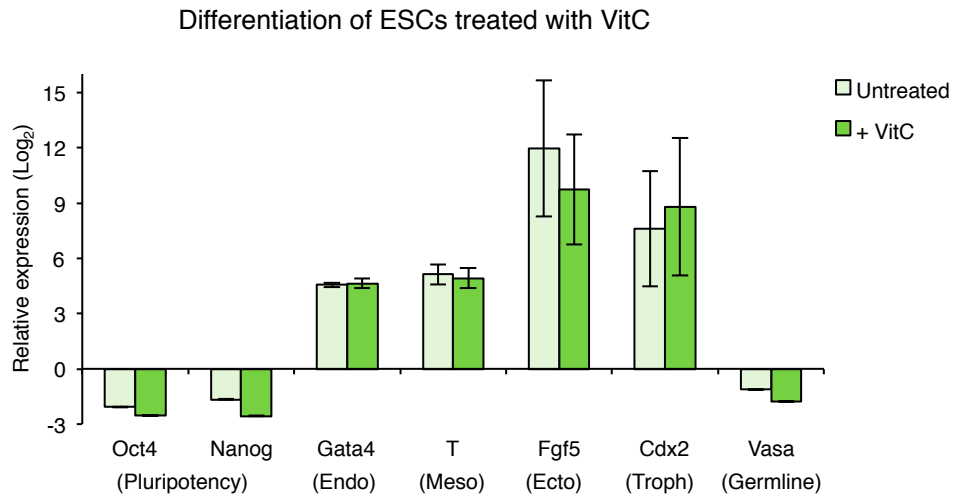

**Supplementary Figure 10: ESCs treated with Vitamin C show normal *in vitro* differentiation.** qRT-PCR analysis of day 5 embryoid bodies generated from untreated or VitC treated ESCs. Data expressed as Log<sub>2</sub> fold relative to untreated ESCs. ESCs treated with VitC up-regulate markers of all three germ layers upon embryoid body differentiation to similar levels as untreated ESCs. Error bars represent s.e.m., n = 3 technical replicates. (Endo = endoderm, Meso = mesoderm, Ecto = ectoderm, Troph = trophectoderm)

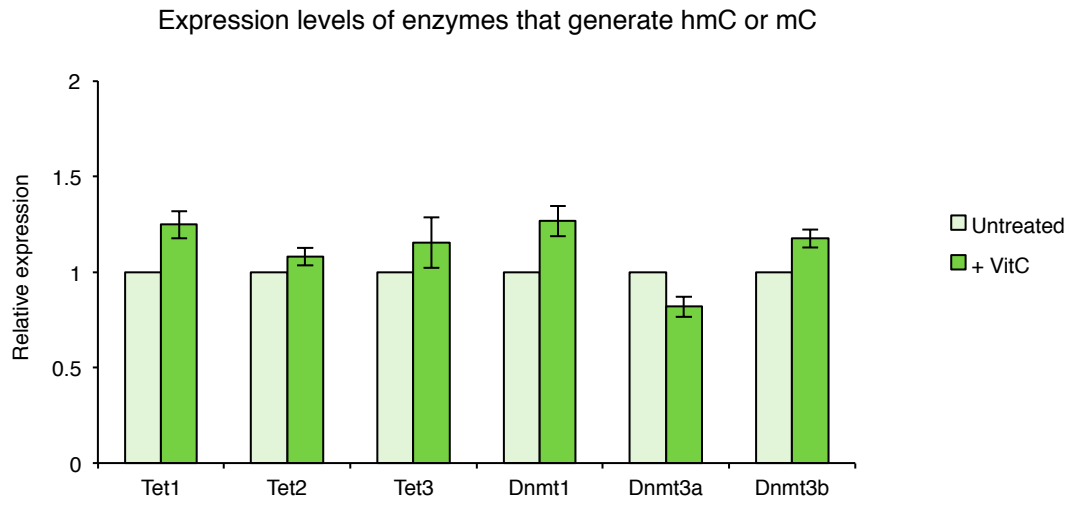

**Supplementary Figure 11: Vitamin C does not alter expression of *Tet* or *Dnmt* genes.** qRT-PCR analysis of ESCs treated with VitC for 72 hours. VitC-induced increase in hmC and decrease in mC cannot be explained by altered expression of *Tet* or *Dnmt* family members. Data expressed as fold relative to untreated ESCs. Error bars represent s.e.m., n = 3 technical replicates.

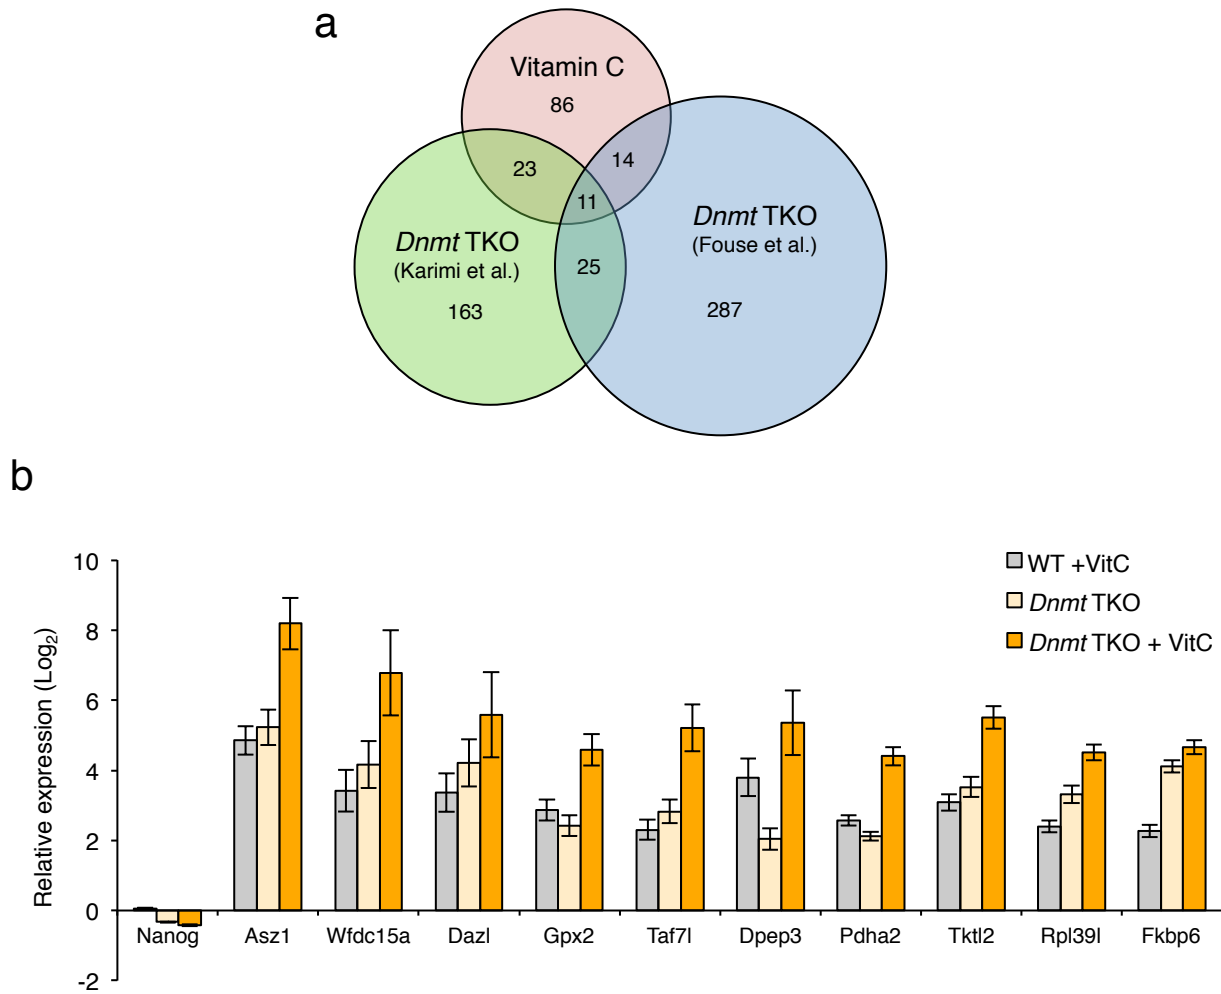

**Supplementary Figure 12: Comparison of gene expression in *Dnmt* TKO and Vitamin C-treated ESCs. a**, 48/134 (36%) of VitC up-regulated genes are also up-regulated in *Dnmt* TKO ESCs. **b**, qRT-PCR analysis for germline genes in wild-type (WT) and *Dnmt* TKO ESCs  $\pm$  VitC. Data are expressed as Log<sub>2</sub> fold relative to untreated wild-type ESCs. VitC-induced germline genes are also up-regulated in *Dnmt* TKO cells. Germline genes up-regulated in *Dnmt* TKO are further induced in response to VitC. Error bars represent s.e.m., n = 3 technical replicates.

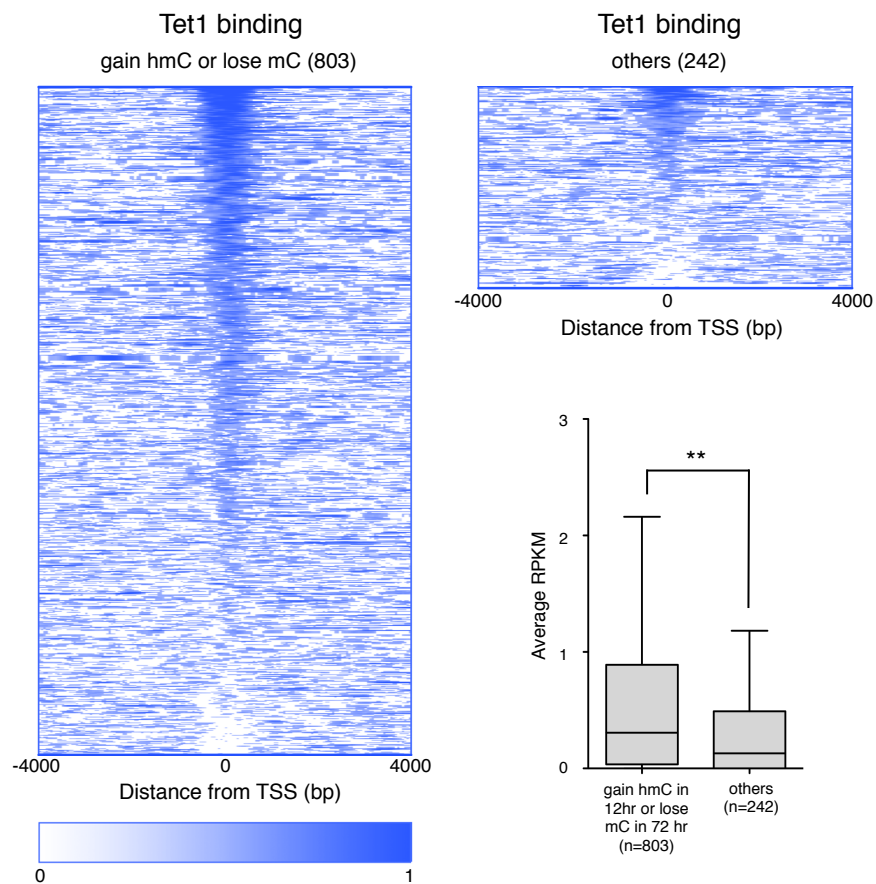

**Supplementary Figure 13: Tet1 binding is enriched near the TSS of promoters affected by Vitamin C.** Tet1 ChIP-seq data (C-term) analyzed from a published data set (ref. 10). The heatmaps show Tet1 RPKM binding values  $\pm 4,000$  bp from the TSS for two categories: 1) methylated promoters that gain hmC at 12 hrs or lose mC at 72 hrs ( $n = 803$ ) and 2) methylated promoters that do not gain hmC at 12 hrs or lose mC at 72 hrs (others) ( $n = 242$ ). Methylated promoters that gain hmC at 12 hrs or lose mC at 72 hrs with VitC are enriched for Tet1 binding compared to promoters that do not display these VitC-induced changes. Box plot of Tet1 RPKM values ( $\pm 500$  bp from the TSS) shows a significantly higher level of Tet1 binding at promoters that gain hmC at 12 hrs or lose mC at 72 hrs of VitC treatment compared to the others category ( $**P < 0.01$ , by t-test). Box plot has Tukey whiskers, a line for the median, and edges for the 25th/75th percentile.

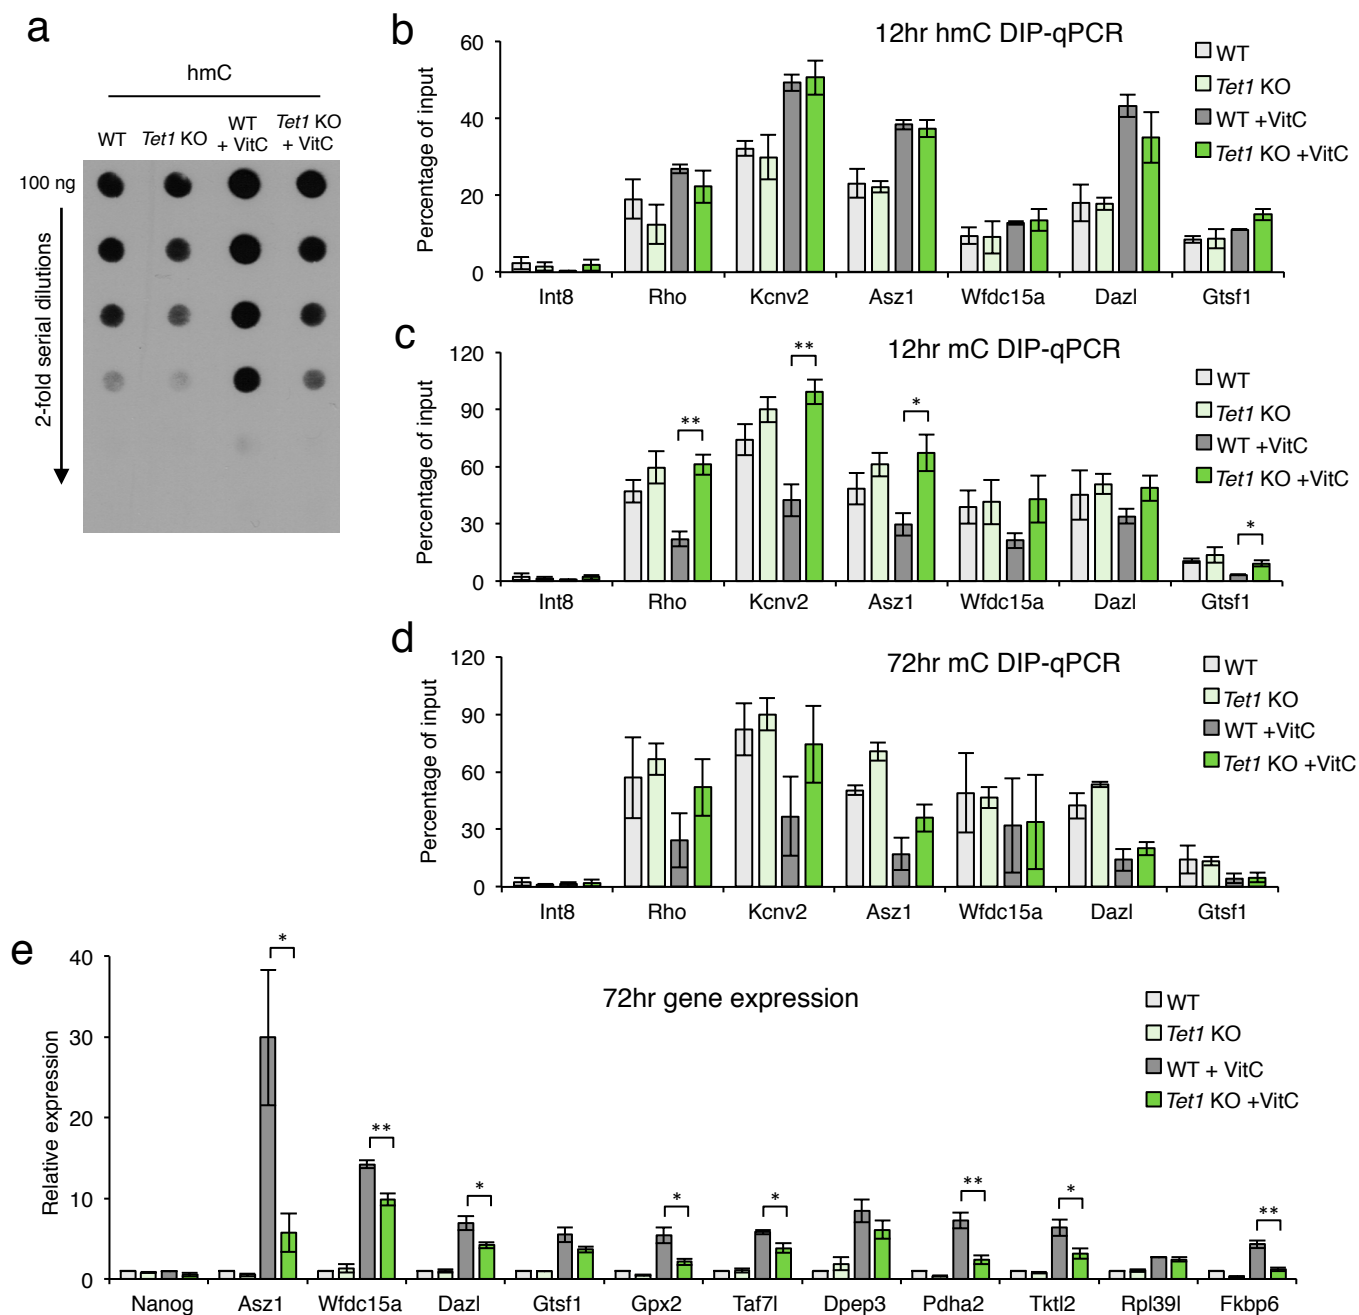

**Supplementary Figure 14: The effects of Vitamin C are partially Tet1-dependent.** **a**, Dot blot for hmC shows that *Tet1* KO cells do not increase hmC to the same extent as wild-type (WT) cells in response to a 12 hr VitC treatment. **b - d**, DIP-qPCR for hmC (**b**) and mC (**c**, **d**) performed on *Tet1* KO cells  $\pm$  VitC. *Tet1* KO cells increase hmC at gene promoters to a similar level as wild-type following 12 hr VitC treatment. VitC-treated *Tet1* KO cells show a significant retention of methylation at a subset of gene promoters compared to wild-type cells at 12 hrs (**c**), but undergo some demethylation after 72 hrs in VitC (**d**). **e**, Germline gene expression in wild-type and *Tet1* KO cells at 72 hrs of VitC treatment. Data are expressed relative to wild-type untreated sample. *Tet1* KO cells show an attenuated up-regulation of germline genes upon VitC treatment.  $n = 3$  biological replicates except for 72 hr mC DIP-qPCR which is  $n = 2$  biological replicates. Data are represented as mean  $\pm$  s.e.m. \* $P < 0.05$ , \*\* $P < 0.01$  by t-test throughout the figure.

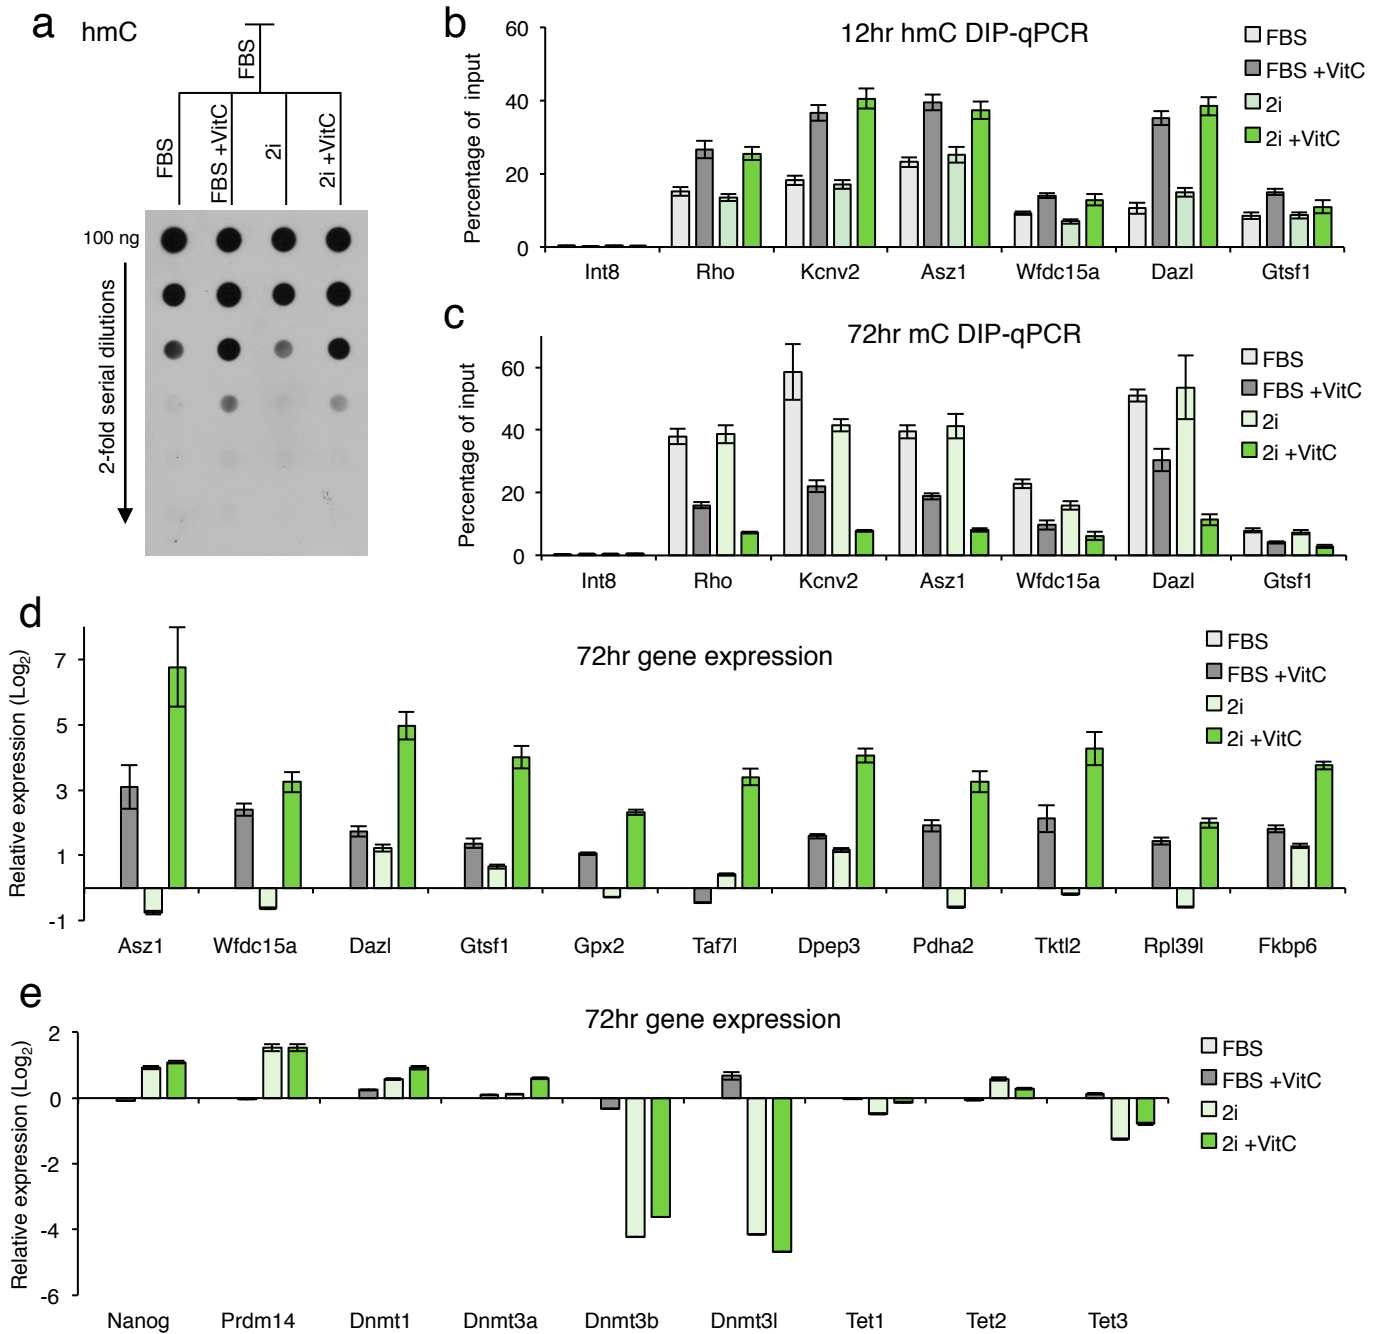

**Supplementary Figure 15: Vitamin C and 2i promote DNA hypomethylation via distinct mechanisms.** ESCs maintained in FBS medium were cultured  $\pm$  VitC or transferred to 2i medium and cultured  $\pm$  VitC for 12 or 72 hrs. **a**, Dot blot for hmC at 12 hrs shows that ESCs grown in both FBS and 2i media increase hmC in response to VitC. **b**, **c**, DIP-qPCR for hmC at 12 hrs (**b**) and mC at 72 hrs (**c**) performed on ESCs grown in FBS or 2i medium  $\pm$  VitC. VitC induces a gain of hmC at 12 hrs and a loss of mC at 72 hrs in both media conditions. **d**, Germline gene expression is increased at 72 hrs of VitC treatment in both media conditions. Data are expressed relative to FBS untreated sample. **e**, 2i, but not VitC, increases expression of naïve pluripotency genes and decreases expression of *Dnmt3b* and *Dnmt3l* after 72 hrs. Data are expressed relative to FBS untreated sample. The effects of VitC are greatest in 2i medium, likely due to the combination of enhanced Tet activity induced by VitC and reduced *Dnmt3b* and *Dnmt3l* expression induced by 2i medium. DIP-qPCR data are represented as mean  $\pm$  s.d. and expression data are represented as mean  $\pm$  s.e.m.,  $n = 3$  technical replicates.

**Supplementary Table 5:** Expression of VitC-induced genes in ESCs cultured in the absence of VitC and ICM using reads per million (RPM) from published single cell RNA-seq (ref. 23). Several VitC-induced genes are expressed in the ICM. Genes in bold were analyzed by qRT-PCR in Fig. 4f.

| <b>Gene Name</b>      | <b>ESCs (RPM)</b> | <b>ICM (RPM)</b> |
|-----------------------|-------------------|------------------|
| <b><i>Asz1</i></b>    | 0.00              | 45.59            |
| <b><i>Wfdc15a</i></b> | 2.48              | 35.95            |
| <b><i>Fkbp6</i></b>   | 1.52              | 17.99            |
| <b><i>Sycp1</i></b>   | 6.65              | 18.42            |
| <b><i>Rpl39l</i></b>  | 105.42            | 299.56           |
| <i>Dazl</i>           | 13.27             | 13.19            |
| <i>Gpx2</i>           | 0.92              | 2.20             |
| <i>Dpep3</i>          | 0.69              | 2.67             |
| <i>Pdha2</i>          | 0.13              | 0.21             |
| <i>Taf7l</i>          | 3.88              | 0.07             |
| <i>Tktl2</i>          | 0.00              | 0.04             |



**Supplementary Table 6: qRT-PCR, DIP-qPCR, and bisulfite primers.**

| Gene Name                | Forward (5' to 3')                        | Reverse (5' to 3')                        |
|--------------------------|-------------------------------------------|-------------------------------------------|
| <b>qRT-PCR</b>           |                                           |                                           |
| <i>Asz1</i>              | GAG TGG GCT TCT CCC AGA AA                | GGT CAT TTT CCC GCT CAT TC                |
| <i>Cdx2</i>              | CCT GCG ACA AGG GCT TGT TTA G             | TCC CGA CTT CCC TTC ACC ATA C             |
| <i>Dazl</i>              | CAA CTG TTA ACT ACC ACT GCA G             | CAA GAG ACC ACT GTC TGT ATG C             |
| <i>Dnmt1</i>             | AGA ACC ACC AGG CAG ACC AC                | CCC CTC TTC CGA CTC TTC CT                |
| <i>Dnmt3a</i>            | ACC AGC AGC TCC TCT CTG GA                | CTC TTC CTT GCC ACG GTT CT                |
| <i>Dnmt3b</i>            | CAA TCT GCA CAG AGC CAG TC                | GGC TGG AGA CCT CCC TCT TA                |
| <i>Dnmt3l</i>            | TCT TCC TCA TCC CCA AAG GA                | GTG ACA GCA GGG TCG TCA GA                |
| <i>Dpep3</i>             | CGG CTA GAT CGG TGT GTG AC                | AGC ACC CCC ATG GAT AGT GT                |
| <i>Fgf5</i>              | CTG TAT GGA CCC ACA GGG AGT AAC           | ATT AAG CTC CTG GGT CGC AAG               |
| <i>Fkbp6</i>             | CGG CTG ATG AAA CTT GGA GA                | AGG CTG GCT TGA ACA GGA AC                |
| <i>Gata4</i>             | CAG CCT GCC TGG ACG G                     | GCC TTC TGA GAA GTC ATC AAA CAT AT        |
| <i>Gtsf1</i>             | GAC TCC CTG GAC CCT GAA AA                | GCC AAT TTG TTT GCG ACA TC                |
| <i>Gpx2</i>              | TGA GCT GCA ATG TCG CTT TC                | CCC CAG GTC GGA CAT ACT TG                |
| <i>L7</i>                | AGC GGA TTG CCT TGA CAG AT                | AAC TTG AAG GGC CAC AGG AA                |
| <i>Nanog</i>             | AGG CTT TGG AGA CAG TGA GGT GC            | TAC CCT CAAACT CCT GGT CCT TC             |
| <i>Oct4</i>              | AGT CTG GAG ACC ATG TTT CTG AAG T         | TAC TCT TCT CGT TGG GAA TAC TCA ATA       |
| <i>Pdha2</i>             | AAG GGC AGG TAT TCG AAG CA                | CTC GTT GGA GGT TCC CAT TC                |
| <i>Prdm14</i>            | GCA CAC AGG GAC AAC TCT CG                | CAG TTC CCA GAA CCT TTG CC                |
| <i>Rpl39l</i>            | TTT AAA CTC GCC GGG AAG AG                | TGT GGAATG GGA CGA TTT TG                 |
| <i>Sycp1</i>             | TTC ATA AAG GAG CGC ACG CG                | TTC TCC ATG CTG CCT CCT GG                |
| <i>T</i>                 | CTC TAA TGT CCT CCC TTG TTG CC            | TGC AGA TTG TCT TTG GCT ACT TTG           |
| <i>Taf7l</i>             | TGT CAT GAC GTT GAG GAA CAG T             | ATC CTT CCA AGC AGC ATT TCT               |
| <i>Tet1</i>              | GAA GCT GCA CCC TGT GAC TG                | GAC AGC AGC CAC ACT TGG TC                |
| <i>Tet2</i>              | AAG CTG ATG GAA AAT GCA AGC               | GCT GAA GGT GCC TCT GGA GT                |
| <i>Tet3</i>              | TCA CAG CCT GCA TGG ACT TC                | ACG CAG CGA TTG TCT TCC TT                |
| <i>Tktl2</i>             | AAA GTG CCA AAG CCA CAG GT                | AGC TTC ACC AAT GCC ACC TT                |
| <i>Ubb</i>               | GCG GTT TGT GCT TTC ATC AC                | GGC AAA GAT CAG CCT CTG CT                |
| <i>Vasa</i>              | TGT GCC TCC CAG CTT CAG TA                | TAT TCA ACG TGT GCT TGC CC                |
| <i>Wfdc15a</i>           | TGT GTG GAA CCC TGG ACA AC                | GCC AAT GCC GTC GTT ATT TT                |
| <b>DIP-qPCR</b>          |                                           |                                           |
| <i>Asz1</i>              | CCT CAC TAT CGC TGC TCT CG                | CGC TCG CTC AAG CTC TGA TA                |
| <i>Dazl</i>              | TAC AAA ATG CCC GCA GAA ATA G             | CCG GAC TCA ACC TTC TCA ATG               |
| <i>Gtsf1</i>             | TTC CTG TGA CTG TGG CTT GC                | GGA GGG TGA GCC AAA GAA AA                |
| <i>IAP</i>               | TAT GCC GG GGT GGT TCT CTA                | TGC GGC AAA ACT TTA TTG CTT               |
| <i>Intergenic Chr8</i>   | AAG GGG CCT CTG CTT AAA AA                | AGA GCT CCA TGG CAG GTA GA                |
| <i>Kcnv2</i>             | GAG TGA GGC TCA AAT ACA CGC C             | TCT TCA GTT GCT CGC TCA GTT C             |
| <i>Rho</i>               | ACC GTA CAG CAC AAG AAG CTG C             | GAA GAC CAT GAA GAG GTC AGC C             |
| <i>Wfdc15a</i>           | GGG AGG ACG TTT GAA TCT GC                | GCA CTT CCG TTT TCC TGA CC                |
| <b>Bisulfite</b>         |                                           |                                           |
| <i>Asz1 (1st round)</i>  | GGT TGT TTT TGT TTT GGT TTG TAA           | TAA AAT ATA ACC CCA TCA AAT TCC           |
| <i>Asz1 (2nd round)</i>  | TTG GTT GGT TTA ATA ATT TGA AAT A         | TAA AAT ATA ACC CCA TCA AAT TCC           |
| <i>Dazl (1st round)</i>  | GAT TTT TGT TAT TTT TTA GTT TTT TTA GGA T | AAA ATT CTC TCA ACT AAC CTA ACT TAT TTC T |
| <i>Dazl (2nd round)</i>  | GTT YGA GTT TTA TTG ATA GAT AGA TGG AT    | ACT AAC CTA ACT TAT TTC TAT AAA ACC TAC   |
| <i>IAP (1st round)</i>   | GGY GTT GAT AGT TGT GTT TTA AGT GGT AAA T | ATT CTA ATT CTA AAA TAA AAA ATC TTC CTT A |
| <i>IAP (2nd round)</i>   | GAT AGT TGT GTT TTA AGT GGT AAA TAA ATA   | ATT CTA ATT CTA AAA TAA AAA ATC TTC CTT A |
| <i>Kcnv2 (1st round)</i> | AGA TTG AGG ATG TGT TTA ATA TTG G         | ACT CCC TTT AAA TCT TCA ATT ACT C         |
| <i>Kcnv2 (2nd round)</i> | TTT ATA AGT TTT TTG GAT GGT TAT AA        | ACT CCC TTT AAA TCT TCA ATT ACT C         |
